# Supplementary material for: Factors Affecting Food Allergy-Related Quality of Life From Parents' Perception in Turkish Children
Source: PubMed Central journal article supplement — Allergy Asthma Immunol Res. 2018 Jun 20;10(4):379–86. doi: 10.4168/aair.2018.10.4.379 (PMC6021590; doi:10.4168/aair.2018.10.4.379), 2018-06-20
Supplement: aair-10-379-s001.pdf [file aair-10-379-s001.pdf]

**Supplementary Table 1.** The values of “*r*” coefficient according to the Spearman correlations between subscale scores of the T-FAQLQ-PF and the FAIM scores, and CHQ PF50

|                          | Emotional impact | Food anxiety | Social and dietary limitations | Total score |
|--------------------------|------------------|--------------|--------------------------------|-------------|
| FAIM 1A                  | 0.287*           | 0.225*       | 0.107                          | 0.232*      |
| FAIM F1B                 | 0.320*           | 0.199*       | 0.182*                         | 0.256*      |
| FAIM F2A                 | 0.096            | 0.094        | 0.234*                         | 0.164*      |
| FAIM F2B                 | 0.189*           | 0.169*       | 0.250*                         | 0.239*      |
| FAIM F3A                 | 0.233*           | 0.213*       | 0.344*                         | 0.301*      |
| FAIM F3B                 | 0.323*           | 0.313*       | 0.327*                         | 0.382*      |
| FAIM F3C                 | 0.323*           | 0.289*       | 0.347*                         | 0.380*      |
| FAIM F4A                 | 0.275*           | 0.222*       | 0.372*                         | 0.326*      |
| FAIM F4B                 | 0.257*           | 0.240*       | 0.349*                         | 0.325*      |
| CHQ PF50 1 1             | -0.349*          | -0.233*      | -0.255*                        | -0.318*     |
| CHQ PF50 2 1             | -0.294*          | -0.221*      | -0.228*                        | -0.284*     |
| CHQ PF50 3 1             | 0.331*           | 0.310*       | 0.387*                         | 0.404*      |
| CHQ PF50 3 2             | -0.386*          | -0.228*      | -0.359*                        | -0.358*     |
| CHQ PF50 4               | -0.246*          | -0.149       | -0.108                         | -0.190*     |
| CHQ PF50 5               | -0.430*          | -0.319*      | -0.345*                        | -0.400*     |
| CHQ PF50 5 2             | -0.343*          | -0.200*      | -0.257*                        | -0.292*     |
| CHQ PF50 6               | -0.398*          | -0.286*      | -0.299*                        | -0.358*     |
| CHQ PF50 7               | -0.331*          | -0.314*      | -0.195*                        | -0.322*     |
| CHQ PF50 8 1             | -0.399*          | -0.291*      | -0.334*                        | -0.380*     |
| CHQ PF50 9 1             | -0.325*          | -0.186*      | -0.132                         | -0.236*     |
| CHQ PF50 9 2             | -0.205*          | -0.108       | -0.165*                        | -0.163*     |
| CHQ PF50 9 3             | -0.311*          | -0.178*      | -0.352*                        | -0.307*     |
| CHQ PF50 9 4             | -0.088           | -0.001       | -0.086                         | -0.039      |
| Duration of food allergy | 0.355*           | 0.410*       | 0.168*                         | 0.383*      |

T-FAQLQ-PF, Turkish Food Allergy QoL Questionnaire-Parent Form; FAIM, Food Allergy Independent Measures; CHQ\_PF50, Child Health Questionnaire-Parent Form 50.  
\* $P < 0.05$ .
